# Supplementary material
Source: PubMed Central journal article supplement (PMC6436028)
Supplement: Supp_Fig2.pdf [file Supp_Fig2.pdf]

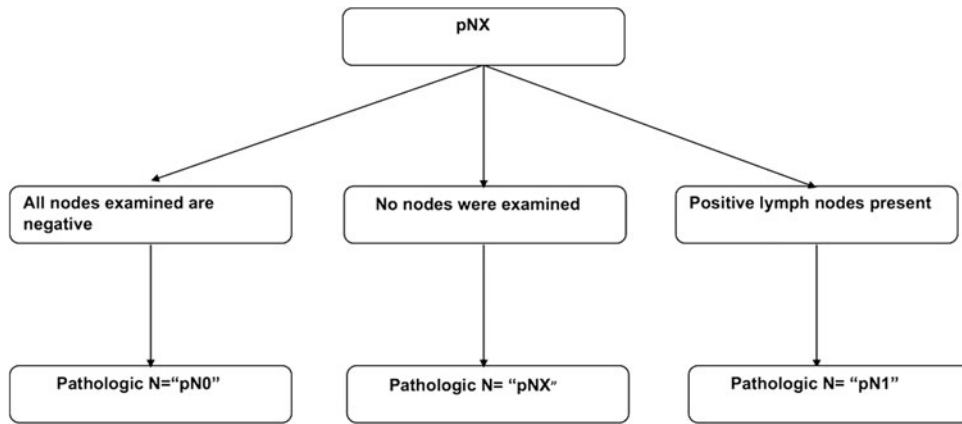

*Footnote: pNX=Regional lymph node not accessible, pN0=No regional lymph node metastasis, pN1=Regional lymph node metastasis.*

**SUPPLEMENTARY FIG. S2.** Flow chart demonstrating methodologic conversion of pNX.
