# Supplementary material
Source: PubMed Central journal article supplement (PMC6436028)
Supplement: Supp_Table1.pdf [file Supp_Table1.pdf]

SUPPLEMENTARY TABLE S1. BEHAVIOR  
AND HISTOLOGY CODES

---

| <i>Histology/behavior<br/>code</i> | <i>Meaning</i>                                  |
|------------------------------------|-------------------------------------------------|
| 8050/3                             | Papillary carcinoma, NOS                        |
| 8260/3                             | Papillary adenocarcinoma, NOS                   |
| 8340/3                             | Papillary adenocarcinoma, follicular<br>variant |
| 8341/3                             | Papillary microcarcinoma                        |
| 8342/3                             | Papillary carcinoma, oxyphilic cell             |
| 8343/3                             | Papillary carcinoma, encapsulated               |
| 8344/3                             | Papillary carcinoma, columnar cell              |

---
