# Supplementary material
Source: PubMed Central journal article supplement (PMC6436028)
Supplement: Supp_Table2.pdf [file Supp_Table2.pdf]

SUPPLEMENTARY TABLE S2. SUMMARY OF CHANGES IN AGE, PRIMARY TUMOR, AND REGIONAL LYMPH NODES  
IN THE SEVENTH AND EIGHTH EDITIONS OF THE AJCC

| <i>Change in definition of</i> | <i>Details</i>                                                                                                                                                                      |
|--------------------------------|-------------------------------------------------------------------------------------------------------------------------------------------------------------------------------------|
| Patient age                    | For staging purposes patient age at diagnosis increased to 55 years                                                                                                                 |
| Primary tumor (T)              | Minor extrathyroidal extension was removed from staging.<br>New T3 staging:<br>(a) Fully intrathyroidal tumor >4 cm<br>(b) Any size tumor with gross extrathyroidal extension       |
| Regional lymph node (N)        | N1a includes level VI (central) and level VII (upper mediastinal) lymph node compartments.<br>pNX and pN0 are used interchangeably denoting lack of clinically significant disease. |
