# Supplementary material
Source: PubMed Central journal article supplement (PMC6436028)
Supplement: Supp_Table3.pdf [file Supp_Table3.pdf]

SUPPLEMENTARY TABLE S3. SUMMARY OF CHANGES IN TNM DISTRIBUTION IN THE SEVENTH AND EIGHTH EDITIONS OF THE AJCC

| <i>Age category</i> | <i>Stage</i> | <i>TNM grouping</i>             |                                     |
|---------------------|--------------|---------------------------------|-------------------------------------|
|                     |              | <i>AJCC (7th edition)</i>       | <i>AJCC (8th edition)</i>           |
| Young               | I            | Any T, any N, M0                | Any T, any N, M0                    |
|                     | II           | Any T, any N, M1                | Any T, any N, M1                    |
|                     | III          | —                               | —                                   |
|                     | IV           | —                               | —                                   |
| Old                 | I            | T1, N0, M0                      | T1–T2, N0/NX, M0                    |
|                     | II           | T2, N0, M0                      | T1–T2, N1, M0<br>T3a/T3b, any N, M0 |
|                     | III          | T3, N0, M0<br>T1–T3, N1a, M0    | T4a, any N, M0                      |
|                     | IVA          | T4a, N0–1b, M0<br>T1–3, N1b, M0 | T4b, any N, M0                      |
|                     | IVB          | T4b, any N, M0                  | Any T, any N, M1                    |
|                     | IVC          | Any T, any N, M1                |                                     |

Age cutoff for the 7th edition is 45 years; age cutoff for the 8th edition is 55 years.
