# Supplementary material
Source: PubMed Central journal article supplement (PMC6436028)
Supplement: Supp_Table4.pdf [file Supp_Table4.pdf]

SUPPLEMENTARY TABLE S4. COX PROPORTIONAL HAZARD MODELING FOR KNOWN COVARIATES

| Factors                       | Hazard ratio [CI]             |                                |                               |                               |                               |                               |
|-------------------------------|-------------------------------|--------------------------------|-------------------------------|-------------------------------|-------------------------------|-------------------------------|
|                               | SEER DSS                      |                                | SEER OS                       |                               | NCDB OS                       |                               |
|                               | 7th edition                   | 8th edition                    | 7th edition                   | 8th edition                   | 7th edition                   | 8th edition                   |
| Stage                         |                               |                                |                               |                               |                               |                               |
| II vs. I                      | 5.51 [3.02–10.1] <sub>c</sub> | 6.49 [4.47–9.45] <sub>c</sub>  | 2.98 [2.41–3.72] <sub>c</sub> | 4.46 [3.74–5.32] <sub>c</sub> | 2.05 [1.89–2.22] <sub>c</sub> | 3.71 [3.47–3.97] <sub>c</sub> |
| III vs. I                     | 4.03 [2.44–6.64]              | 32.5 [20.9–50.5]               | 2.44 [1.99–2.98]              | 15.5 [11.8–20.3]              | 2.51 [2.32–2.69]              | 7.71 [6.87–8.63]              |
| IV vs. I                      | 47.4 [31.1–72.4] <sub>c</sub> | 82.8 [56.7–120.9] <sub>c</sub> | 10.5 [8.79–12.7] <sub>c</sub> | 27.5 [21.9–34.5] <sub>c</sub> | 5.67 [5.24–6.14] <sub>c</sub> | 16.2 [14.7–18.8] <sub>c</sub> |
| Sex                           |                               |                                |                               |                               |                               |                               |
| Male vs. female               | 2.04 [1.63–2.57]              | 2.35 [1.87–2.95]               | 1.83 [1.61–2.08]              | 1.96 [1.73–2.23] <sub>c</sub> | 1.89 [1.81–1.99]              | 1.95 [1.86–2.05] <sub>c</sub> |
| Race                          |                               |                                |                               |                               |                               |                               |
| White vs. black               | 1.01 [0.55–1.85]              | 1.05 [0.57–1.93]               | 0.67 [0.53–0.84]              | 0.41 [0.29–0.56]              | 0.74 [0.68–0.81] <sub>c</sub> | 0.75 [0.67–0.82] <sub>c</sub> |
| Insurance                     |                               |                                |                               |                               |                               |                               |
| Insured vs. not insured       | 0.77 [0.41–1.45]              | 0.67 [0.36–1.93]               | 1.07 [0.72–1.62]              | 1.18 [0.66–2.09]              | 1.45 [1.21–1.74] <sub>c</sub> | 1.35 [1.12–1.62] <sub>c</sub> |
| Margin status <sup>a</sup>    |                               |                                |                               |                               |                               |                               |
| Positive vs. negative         | — <sub>c</sub>                | —                              | — <sub>c</sub>                | —                             | 1.37 [1.28–1.47] <sub>c</sub> | 1.31 [1.22–1.41] <sub>c</sub> |
| Multifocality                 |                               |                                |                               |                               |                               |                               |
| Multifocal vs. unifocal       | 0.72 [0.57–0.91] <sub>c</sub> | 0.88 [0.71–1.12]               | 0.81 [0.71–0.92] <sub>c</sub> | 0.88 [0.71–1.13]              | 0.92 [0.88–0.97] <sub>c</sub> | 0.98 [0.92–1.03] <sub>c</sub> |
| RAI                           |                               |                                |                               |                               |                               |                               |
| Yes vs. no                    | 0.66 [0.53–0.87] <sub>c</sub> | 0.82 [0.64–1.05]               | 0.53 [0.46–0.61] <sub>c</sub> | 0.91 [0.79–1.02]              | 0.52 [0.49–0.55] <sub>c</sub> | 0.55 [0.52–0.58] <sub>c</sub> |
| ETE                           |                               |                                |                               |                               |                               |                               |
| Yes vs. no                    | 3.26 [2.38–4.48] <sub>c</sub> | 2.59 [1.85–3.63] <sub>c</sub>  | 1.52 [1.29–1.79] <sub>c</sub> | 1.13 [0.95–1.34] <sub>c</sub> | 1.08 [1.01–1.16] <sub>c</sub> | 0.95 [0.88–1.02] <sub>c</sub> |
| Extent of surgery             |                               |                                |                               |                               |                               |                               |
| Total vs. partial             | 0.42 [0.29–0.61]              | 0.61 [0.42–0.86]               | 0.74 [0.62–0.88]              | 0.81 [0.67–0.98]              | 0.79 [0.74–0.4]               | 0.83 [0.77–0.88]              |
| Years of diagnosis            | 0.95 [0.88–1.03]              | 0.96 [0.89–1.04]               | 0.99 [0.95–1.04]              | 0.99 [0.95–1.04]              | 1.01 [0.99–1.02]              | 1.01 [0.99–1.04]              |
| Statistical model performance |                               |                                |                               |                               |                               |                               |
| AIC <sup>b</sup>              | 5314                          | 5243                           | 20,224                        | 20,064                        | 153,664                       | 152,972                       |

<sup>a</sup>Margin status not collected in SEER.

<sup>b</sup>Smaller AIC indicates better fit to the data.

<sup>c</sup>Indicates statistical significance, with a *p*-value of  $\leq 0.05$ .
