# Supplementary material
Source: PubMed Central journal article supplement (PMC6436028)

## Supplementary Data

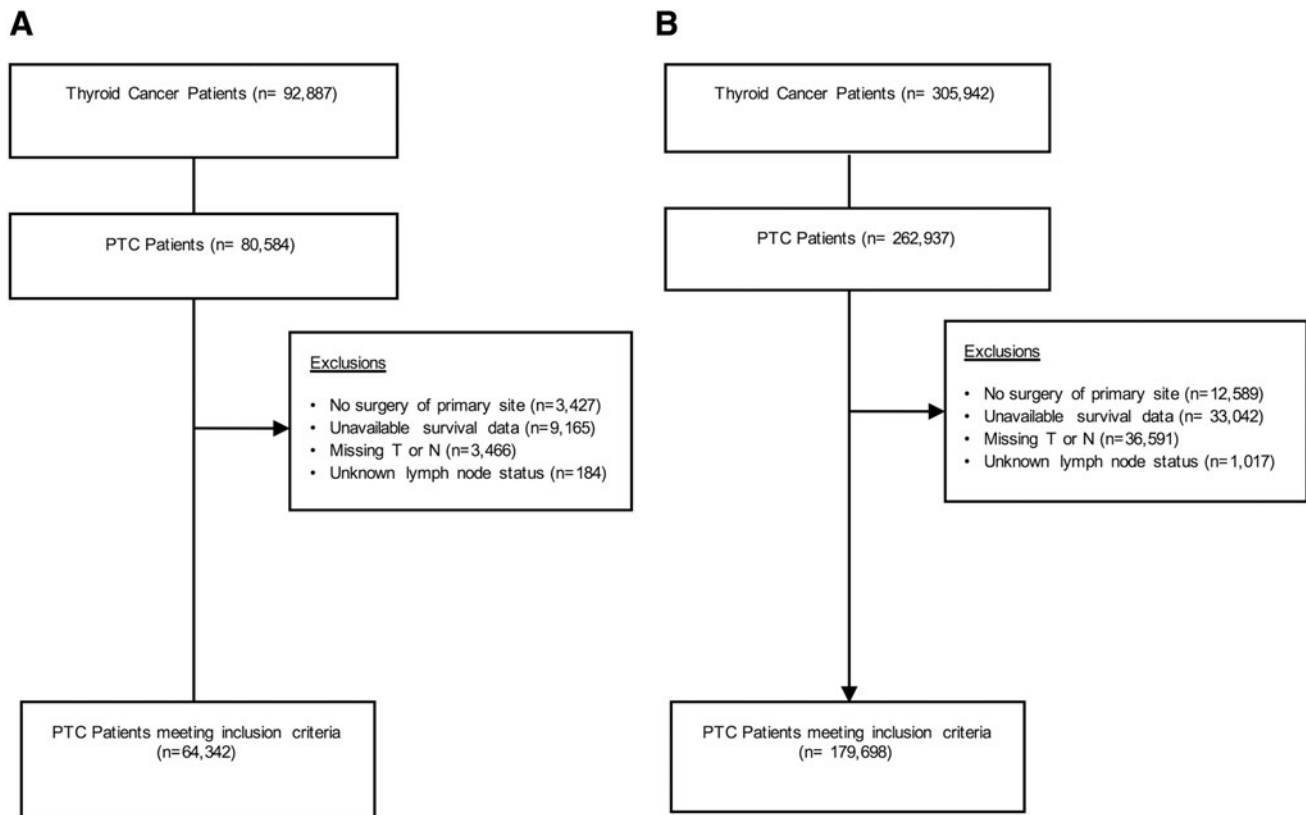

**SUPPLEMENTARY FIG. S1.** CONSORT flow diagram for (A) SEER (B) NCDB.

Supplement: Supp_Fig1.pdf [file Supp_Fig1.pdf]
